# Supplementary material for: Epidemiologically Optimal Static Networks from Temporal Network Data
Source: PLOS journal article supplement (doi:10.1371/journal.pcbi.1003142), 2013-07-18
Supplement: S5 (10.1371/journal.pcbi.1003142.s005) [file journal.pcbi.1003142.s005]

**Table S1.** Maximal performance for the empirical data sets using coreness as importance measure for the static networks. The format is the same as Table 2 of the paper. Comparing Tables 2 and S1, we see that the results are rather similar for the degree and coreness values. In most cases, coreness outperforms degree (confirming the conclusions of Ref. [7]), but the difference is often in the third decimal of  $\rho_{\max}$ . We note that the optimal performance varies quite a bit—from 0.74 for the *Prostitution* data to 0.93 for *E-mail 2*.

|                     | Time slice    |                    |                   | Ongoing       |                    |                   | Exponential threshold |          |          | Acc.     |
|---------------------|---------------|--------------------|-------------------|---------------|--------------------|-------------------|-----------------------|----------|----------|----------|
|                     | $\rho_{\max}$ | $t_{\text{start}}$ | $t_{\text{stop}}$ | $\rho_{\max}$ | $t_{\text{start}}$ | $t_{\text{stop}}$ | $\rho_{\max}$         | $\tau$   | $\Omega$ | $\rho$   |
| <i>E-mail 1</i>     | 0.739(1)      | 0                  | 0.42(2)           | 0.496(4)      | 0.27(2)            | 0.27(2)           | 0.775(4)              | 0.40(2)  | 0.30(2)  | 0.459(4) |
| <i>E-mail 2</i>     | 0.907(2)      | 0                  | 0.25(3)           | 0.912(5)      | 0.17(3)            | 0.17(2)           | 0.930(2)              | 1.0(1)   | 0.26(1)  | 0.884(3) |
| <i>Dating</i>       | 0.829         | 0                  | 0.65(3)           | 0.419(3)      | 0.25(2)            | 0.75(3)           | 0.868(2)              | 0.20(1)  | 0.20(2)  | 0.721(4) |
| <i>Gallery</i>      | 0.77(2)       | 0                  | 0.72(3)           | 0.53(2)       | 0.39(3)            | 0.39(3)           | 0.87(2)               | 0.64(5)  | 0.78(3)  | 0.76(1)  |
| <i>Conference</i>   | 0.778(3)      | 0                  | 0.10(2)           | 0.759(3)      | 0.07(2)            | 0.10(1)           | 0.780(2)              | 0.60(5)  | 0.22(2)  | 0.394(6) |
| <i>Prostitution</i> | 0.731(2)      | 0                  | 0.77(3)           | 0.301(3)      | 0.60(3)            | 0.60(3)           | 0.742(2)              | 0.032(4) | 0.22(2)  | 0.522(5) |
